# Supplementary material
Source: PubMed Central journal article supplement (PMC4128070)
Supplement: bph0171-3741-SD3.pdf [file bph0171-3741-SD3.pdf]

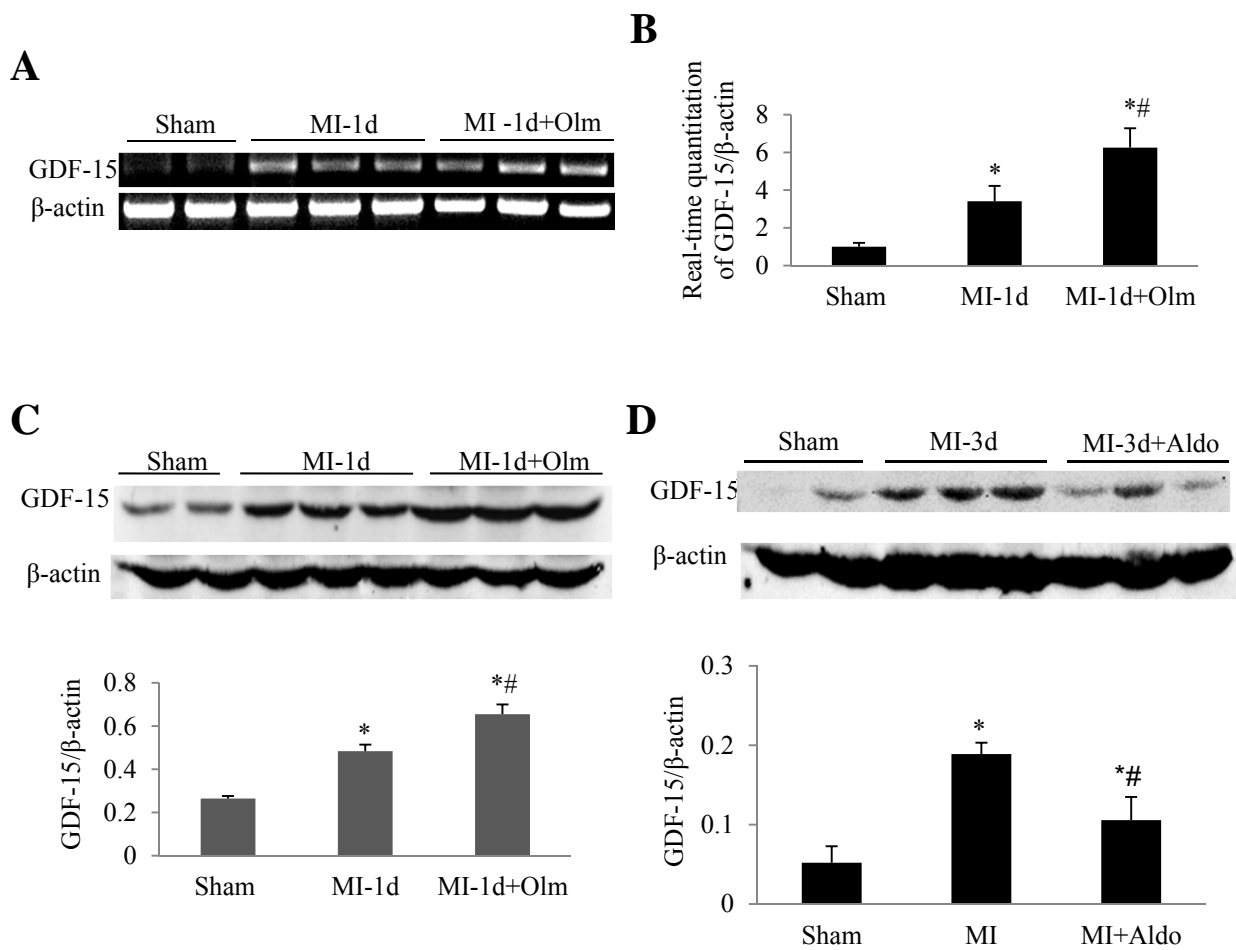

**Figure S8. Effects of olmesartan (Olm) and aldosterone (Aldo) on myocardial GDF-15 expression in mice subjected to myocardial infarction (MI).** Result of routine PCR (A) and real-time quantitative PCR (B) for GDF-15 expression in response to sham or MI treated with/without Olm. (C) Western blotting of GDF-15 expression in response to sham or MI treated with/without Olm. (D) Western blots of GDF-15 in MI mice for 3 days treated with/without Aldo. \* $P < 0.05$  vs. sham group, # $P < 0.05$  vs. MI group,  $n = 4$  in sham groups,  $n = 6$  in MI, MI + Olm and MI + Aldo groups.
